# Supplementary material
Source: MDPI journal article supplement (https://www.mdpi.com/2071-1050/8/2/150)
Supplement: s1 [file s1]

# Supplementary Materials: The Role of Rail Transit Systems in Reducing Energy and Carbon Dioxide Emissions: The Case of The City of Rio de Janeiro

Carlos Andrade and Márcio D'Agosto

All calculations were done with Microsoft Excel. Due to rounding, numbers presented in this text can be somewhat different from those calculated in the spreadsheets.

All references in this text also appear in the main text and in the reference list.

All supplementary informations are related to Rio de Janeiro Metro Line 4 in the period: second half of 2016 to 2040. All equations referenced are described in the main text.

## 1. Transport Performance of L4

### 1.1. O-D Matrix: Distance in Kilometers between Line 4 Metro Stations. Source: Flores [1]

**Table S1.** O-D Matrix: Distance in Kilometers between Line 4 Metro Stations. Source: Flores [1].

|       | JOC    | SCO   | ATQ   | JAL   | NSP    | GOS    | GAV    | L1-L2  |
|-------|--------|-------|-------|-------|--------|--------|--------|--------|
| JOC   | -      | 6.108 | 9.428 | 10.2  | 11.265 | 12.339 | 11.732 | 12.339 |
| SCO   | 6.108  | -     | 3.32  | 4.092 | 5.157  | 6.231  | 5.624  | 6.31   |
| ATQ   | 9.428  | 3.32  | -     | 0.772 | 1.837  | 2.911  | 2.304  | 2.911  |
| JAL   | 10.2   | 4.092 | 0.772 | -     | 1.065  | 2.139  | 3.076  | 2.139  |
| NSP   | 11.265 | 5.157 | 1.837 | 1.065 | -      | 1.074  | 4.141  | 1.074  |
| GOS   | 12.339 | 6.231 | 2.911 | 2.139 | 1.074  | -      | 5.215  | -      |
| GAV   | 11.732 | 5.624 | 2.304 | 3.076 | 4.141  | 5.215  | -      | 5.215  |
| L1-L2 | 12.339 | 6.231 | 2.911 | 2.139 | 1.074  | -      | 5.215  | -      |

Stations: JOC = Jardim Oceânico; SCO = São Conrado; ATQ = Antero de Quental; JAL = Jardim de Alah; NSP = N. Sa. da Paz; GOS = General Osório; GAV = Gávea; L1-L2 = Lines 1 or 2.

e.g., the distance from JOC to NSP is 11.265 km.

### 1.2. O-D Matrix: Passengers Traveling–Three Morning Peak Hours on Business Days-2016. Source: FGV [2]

**Table S2.** O-D Matrix: Passengers Traveling–Three Morning Peak Hours on Business Days-2016. Source: FGV [2].

|       | JOC    | SCO    | ATQ  | JAL  | NSP    | GOS  | GAV  | L1-L2  | TOTAL  |
|-------|--------|--------|------|------|--------|------|------|--------|--------|
| JOC   | -      | 2635   | 1933 | 966  | 2459   | 1050 | 1846 | 19,654 | 30,543 |
| SCO   | 2748   | -      | 2205 | 910  | 558    | 1195 | 979  | 6093   | 14,688 |
| ATQ   | 924    | 2386   | -    | 235  | 538    | 270  | 138  | 1988   | 6479   |
| JAL   | 418    | 839    | 90   | -    | 160    | 202  | 52   | 1633   | 3394   |
| NSP   | 410    | 480    | 515  | 129  | -      | 1119 | 38   | 2819   | 5510   |
| GOS   | 504    | 1067   | 514  | 387  | 4495   | -    | 123  | -      | 7090   |
| GAV   | 929    | 712    | 179  | 51   | 701    | 277  | -    | 601    | 3450   |
| L1-L2 | 4523   | 4745   | 3908 | 2817 | 6546   | -    | 1978 | -      | 24,517 |
| TOTAL | 10,456 | 12,864 | 9344 | 5495 | 15,457 | 4113 | 5154 | 32,788 | 95,671 |

e.g., 30,543 passengers embarked in JOC. 2459 of these passengers disembarked in NSP.

1.3. O-D Matrix: Passenger Kilometer (PKM)–Three Morning Peak Hours on Business Days-2016.  
(By Applying Equation (1))

**Table S3.** O-D Matrix: Passenger Kilometer (PKM)–Three Morning Peak Hours on Business Days-2016.

|              | JOC            | SCO           | ATQ           | JAL           | NSP           | GOS           | GAV           | L1-L2          | TOTAL          |
|--------------|----------------|---------------|---------------|---------------|---------------|---------------|---------------|----------------|----------------|
| JOC          | -              | 16,095        | 18,224        | 9853          | 27,701        | 12,956        | 21,657        | 242,511        | 348,997        |
| SCO          | 16,785         | -             | 7321          | 3724          | 2878          | 7446          | 5506          | 37,965         | 81,624         |
| ATQ          | 8711           | 7922          | -             | 181           | 988           | 786           | 318           | 5787           | 24,694         |
| JAL          | 4264           | 3433          | 69            | -             | 170           | 432           | 160           | 3493           | 12,022         |
| NSP          | 4619           | 2475          | 946           | 137           | -             | 1202          | 157           | 3028           | 12,564         |
| GOS          | 6219           | 6648          | 1496          | 828           | 4828          | -             | 641           | -              | 20,660         |
| GAV          | 10,899         | 4004          | 412           | 157           | 2903          | 1445          | -             | 3134           | 22,954         |
| L1-L2        | 55,809         | 29,566        | 11,376        | 6026          | 7030          | -             | 10,315        | -              | 120,123        |
| <b>TOTAL</b> | <b>107,306</b> | <b>70,144</b> | <b>39,845</b> | <b>20,906</b> | <b>46,498</b> | <b>24,266</b> | <b>38,755</b> | <b>295,918</b> | <b>643,638</b> |

e.g., the passengers who embarked in JOC and disembarked in NSP were responsible for:  
11.265 km × 2459 passengers = 27,701 PKM.

The total PKM for three morning peak hours in 2016 is 643,638 km.

1.4. O-D Matrix: Passengers Traveling–Three Morning Peak Hours on Business Days-2026. Source: FGV [2]

**Table S4.** O-D Matrix: Passengers Traveling–Three Morning Peak Hours on Business Days-2026.  
Source: FGV [2].

|              | JOC           | SCO           | ATQ           | JAL         | NSP           | GOS         | GAV         | L1-L2         | TOTAL          |
|--------------|---------------|---------------|---------------|-------------|---------------|-------------|-------------|---------------|----------------|
| JOC          | -             | 4044          | 2915          | 1427        | 3651          | 1583        | 2564        | 29,018        | 45,202         |
| SCO          | 4186          | -             | 3359          | 1382        | 844           | 1810        | 1353        | 9243          | 22,177         |
| LEB          | 921           | 2408          | -             | 234         | 536           | 269         | 125         | 1980          | 6473           |
| JDA          | 415           | 843           | 89            | -           | 159           | 201         | 47          | 1628          | 3382           |
| NSP          | 494           | 580           | 623           | 156         | -             | 1361        | 42          | 3397          | 6653           |
| IGO          | 589           | 1246          | 604           | 449         | 5451          | -           | 131         | -             | 8470           |
| GAV          | 863           | 665           | 167           | 47          | 654           | 258         | -           | 557           | 3211           |
| L1-L2        | 4983          | 4730          | 4132          | 2906        | 6655          | -           | 1791        | -             | 25,197         |
| <b>TOTAL</b> | <b>12,451</b> | <b>14,516</b> | <b>11,889</b> | <b>6601</b> | <b>17,950</b> | <b>5482</b> | <b>6053</b> | <b>45,823</b> | <b>120,765</b> |

1.5. O-D Matrix: PKM–Three Morning Peak Hours on Business Days-2026. (By Applying Equation (1))

**Table S5.** O-D Matrix: PKM–Three Morning Peak Hours on Business Days-2026.

|              | JOC            | SCO           | ATQ           | JAL           | NSP           | GOS           | GAV           | L1-L2          | TOTAL          |
|--------------|----------------|---------------|---------------|---------------|---------------|---------------|---------------|----------------|----------------|
| JOC          | -              | 24,701        | 27,483        | 14,555        | 41,129        | 19,533        | 30,081        | 358,053        | 515,534        |
| SCO          | 25,568         | -             | 11,152        | 5655          | 4353          | 11,278        | 7609          | 57,593         | 123,208        |
| LEB          | 8683           | 7995          | -             | 181           | 985           | 783           | 288           | 5764           | 24,678         |
| JDA          | 4233           | 3450          | 69            | -             | 169           | 430           | 145           | 3482           | 11,977         |
| NSP          | 5565           | 2991          | 1144          | 166           | -             | 1462          | 174           | 3648           | 15,151         |
| IGO          | 7268           | 7764          | 1758          | 960           | 5854          | -             | 683           | -              | 24,288         |
| GAV          | 10,125         | 3740          | 385           | 145           | 2708          | 1345          | -             | 2905           | 21,352         |
| L1-L2        | 61,485         | 29,473        | 12,028        | 6216          | 7147          | -             | 9340          | -              | 125,690        |
| <b>TOTAL</b> | <b>122,927</b> | <b>80,112</b> | <b>54,019</b> | <b>27,878</b> | <b>62,345</b> | <b>34,831</b> | <b>48,320</b> | <b>431,445</b> | <b>861,878</b> |

1.6. O-D Matrix: Passengers Traveling–Three Morning Peak Hours on Business Days-2036. Source: FGV [2]

**Table S6.** O-D Matrix: Passengers Traveling–Three Morning Peak Hours on Business Days-2036.

|              | JOC           | SCO           | ATQ           | JAL         | NSP           | GOS         | GAV         | L1-L2         | TOTAL          |
|--------------|---------------|---------------|---------------|-------------|---------------|-------------|-------------|---------------|----------------|
| JOC          | -             | 3360          | 2997          | 1225        | 3077          | 1332        | 2607        | 41,353        | 55,951         |
| SCO          | 5973          | -             | 3535          | 1321        | 779           | 1645        | 1440        | 9864          | 24,557         |
| LEB          | 1505          | 2381          | -             | 208         | 535           | 263         | 144         | 2696          | 7732           |
| JDA          | 664           | 807           | 87            | -           | 160           | 186         | 53          | 2202          | 4159           |
| NSP          | 692           | 452           | 622           | 154         | -             | 1154        | 42          | 4287          | 7403           |
| IGO          | 1015          | 1223          | 716           | 473         | 5908          | -           | 166         | -             | 9501           |
| GAV          | 1209          | 547           | 173           | 47          | 580           | 223         | -           | 669           | 3448           |
| L1-L2        | 7117          | 4910          | 4453          | 2671        | 7253          | -           | 2147        | -             | 28,551         |
| <b>TOTAL</b> | <b>18,175</b> | <b>13,680</b> | <b>12,583</b> | <b>6099</b> | <b>18,292</b> | <b>4803</b> | <b>6599</b> | <b>61,071</b> | <b>141,302</b> |

1.7. O-D Matrix: PKM–Three Morning Peak Hours on Business Days-2036. (By Applying Equation (1))

**Table S7.** O-D Matrix: PKM–Three Morning Peak Hours on Business Days-2036.

|              | JOC            | SCO           | ATQ           | JAL           | NSP           | GOS           | GAV           | L1-L2          | TOTAL            |
|--------------|----------------|---------------|---------------|---------------|---------------|---------------|---------------|----------------|------------------|
| JOC          | -              | 20,523        | 28,256        | 12,495        | 34,662        | 16,436        | 30,585        | 510,255        | 653,212          |
| SCO          | 36,483         | -             | 11,736        | 5406          | 4017          | 10,250        | 8099          | 61,463         | 137,453          |
| LEB          | 14,189         | 7905          | -             | 161           | 983           | 766           | 332           | 7848           | 32,183           |
| JDA          | 6773           | 3302          | 67            | -             | 170           | 398           | 163           | 4710           | 15,584           |
| NSP          | 7795           | 2331          | 1143          | 164           | 0             | 1239          | 174           | 4604           | 17,451           |
| IGO          | 12,524         | 7621          | 2084          | 1012          | 6345          | -             | 866           | -              | 30,452           |
| GAV          | 14,184         | 3076          | 399           | 145           | 2402          | 1163          | -             | 3489           | 24,857           |
| L1-L2        | 87,817         | 30,594        | 12,963        | 5713          | 7790          | -             | 11,197        | -              | 156,073          |
| <b>TOTAL</b> | <b>179,765</b> | <b>75,352</b> | <b>56,647</b> | <b>25,095</b> | <b>56,370</b> | <b>30,251</b> | <b>51,415</b> | <b>592,368</b> | <b>1,067,263</b> |

1.8. O-D Matrix: Passengers Traveling–Three Morning Peak Hours on Business Days-2040. Source: FGV [2]

**Table S8.** O-D Matrix: Passengers Traveling–Three Morning Peak Hours on Business Days-2040.

|              | JOC           | SCO           | ATQ           | JAL         | NSP           | GOS         | GAV         | L1-L2         | TOTAL          |
|--------------|---------------|---------------|---------------|-------------|---------------|-------------|-------------|---------------|----------------|
| JOC          | -             | 3025          | 3018          | 1147        | 2861          | 1230        | 2613        | 47,462        | 61,356         |
| SCO          | 6571          | -             | 3681          | 1323        | 780           | 1604        | 1513        | 9944          | 25,416         |
| LEB          | 1831          | 2340          | -             | 198         | 534           | 259         | 152         | 3079          | 8393           |
| JDA          | 801           | 783           | 86            | -           | 160           | 179         | 56          | 2486          | 4551           |
| NSP          | 791           | 405           | 622           | 153         | -             | 1073        | 42          | 4755          | 7841           |
| IGO          | 1253          | 1190          | 761           | 480         | 6059          | -           | 181         | -             | 9924           |
| GAV          | 1384          | 499           | 175           | 47          | 553           | 209         | -           | 727           | 3594           |
| L1-L2        | 8194          | 4867          | 4552          | 2563        | 7447          | -           | 2292        | -             | 29,915         |
| <b>TOTAL</b> | <b>20,825</b> | <b>13,109</b> | <b>12,895</b> | <b>5911</b> | <b>18,394</b> | <b>4554</b> | <b>6849</b> | <b>68,453</b> | <b>150,990</b> |

1.9. O-D Matrix: PKM–Three Morning Peak Hours on Business Days-2040. (By Applying Equation (1))

**Table S9.** O-D Matrix: PKM–Three Morning Peak Hours on Business Days-2040.

|              | JOC            | SCO           | LEB           | JDA           | NSP           | GOS           | GAV           | L1-L2          | TOTAL            |
|--------------|----------------|---------------|---------------|---------------|---------------|---------------|---------------|----------------|------------------|
| JOC          | -              | 18,477        | 28,454        | 11,699        | 32,229        | 15,177        | 30,656        | 585,634        | 722,325          |
| SCO          | 40,136         | 0             | 12,221        | 5414          | 4022          | 9995          | 8509          | 61,961         | 142,257          |
| LEB          | 17,263         | 7769          | -             | 153           | 981           | 754           | 350           | 8963           | 36,232           |
| JDA          | 8170           | 3204          | 66            | 0             | 170           | 383           | 172           | 5318           | 17,484           |
| NSP          | 8911           | 2089          | 1143          | 163           | -             | 1152          | 174           | 5107           | 18,738           |
| IGO          | 15,461         | 7415          | 2215          | 1027          | 6507          | 0             | 944           | -              | 33,569           |
| GAV          | 16,237         | 2806          | 403           | 145           | 2290          | 1090          | -             | 3791           | 26,762           |
| L1-L2        | 101,106        | 30,326        | 13,251        | 5482          | 7998          | -             | 11,953        | -              | 170,116          |
| <b>TOTAL</b> | <b>207,283</b> | <b>72,086</b> | <b>57,753</b> | <b>24,082</b> | <b>54,198</b> | <b>28,551</b> | <b>52,758</b> | <b>670,773</b> | <b>1,167,484</b> |

1.10. PKM on Business Days

PKM of morning peak on business days = 20.70% of PKM on business day as observed in other lines [1].

PKM on business days will be:

$$2016: 643,638/20.70\% = 3,109,362.$$

$$2026: 861,878/20.70\% = 4,163,660.$$

$$2036: 1,067,263/20.70\% = 5,155,862.$$

$$2040: 1,167,484/20.70\% = 5,640,020.$$

1.11. PKM on Saturdays, Sundays and Holidays

As observed in other lines PKM on Saturdays, Sundays and holidays are, respectively, 39%, 21% and 23% of business day [1].

PKM on Saturdays will be:

$$2016: 3,109,362 \times 39\% = 1,212,651.$$

$$2026: 4,163,660 \times 39\% = 1,623,827.$$

$$2036: 5,155,862 \times 39\% = 2,010,786.$$

$$2040: 5,640,020 \times 39\% = 2,199,608.$$

PKM on Sundays will be:

$$2016: 3,109,362 \times 21\% = 652,966.$$

$$2026: 4,163,660 \times 21\% = 874,369.$$

$$2036: 5,155,862 \times 21\% = 1,082,731.$$

$$2040: 5,640,020 \times 21\% = 1,184,404.$$

PKM on holidays will be:

$$2016: 3,109,362 \times 23\% = 715,153.$$

$$2026: 4,163,660 \times 23\% = 957,642.$$

$$2036: 5,155,862 \times 23\% = 1,185,848.$$

$$2040: 5,640,020 \times 23\% = 1,297,205.$$

1.12. PKM per Year

Considering the 2016 calendar there is 252 business days; 52 Saturdays; 52 Sundays and holidays nine. The total PKM per year will be:

2016:  $252 \times 3,109,362 + 52 \times 1,212,651 + 52 \times 652,966 + 9 \times 715,153 = 887,007,658$  (It was considered half of this value — 443,503,829 — because L4 starts operation on second half of 2016).

$$2026: 252 \times 4,163,660 + 52 \times 1,623,827 + 52 \times 874,369 + 9 \times 957,642 = 1,187,767,243.$$

$$2036: 252 \times 5,155,862 + 52 \times 2,010,786 + 52 \times 1,082,731 + 9 \times 1,185,848 = 1,470,812,762.$$

$$2040: 252 \times 5,640,020 + 52 \times 2,199,608 + 52 \times 1,184,404 + 9 \times 1,297,205 = 1,608,928,623.$$

Annual growth rate:

Between 2016 and 2026:  $(1,187,767,243/887,007,658)^{1/10} - 1 = 2.96\%$ .

Between 2026 and 2036:  $(1,470,812,762/1,187,767,243)^{1/10} - 1 = 2.16\%$ .

Between 2036 and 2046:  $(1,608,928,623/1,470,812,762)^{1/4} - 1 = 2.27\%$ .

Considering the annual growth rate, the PKM in each year is presented in Table S10.

**Table S10.** PKM per year.

| Year                  | PKM                   |
|-----------------------|-----------------------|
| second half of 2016   | 443,503,829           |
| 2017                  | 913,288,032           |
| 2018                  | 940,347,045           |
| 2019                  | 968,207,766           |
| 2020                  | 996,893,947           |
| 2021                  | 1,026,430,046         |
| 2022                  | 1,056,841,245         |
| 2023                  | 1,088,153,470         |
| 2024                  | 1,120,393,418         |
| 2025                  | 1,153,588,575         |
| 2026                  | 1,187,767,243         |
| 2027                  | 1,213,427,822         |
| 2028                  | 1,239,642,773         |
| 2029                  | 1,266,424,074         |
| 2030                  | 1,293,783,959         |
| 2031                  | 1,321,734,928         |
| 2032                  | 1,350,289,751         |
| 2033                  | 1,379,461,474         |
| 2034                  | 1,409,263,424         |
| 2035                  | 1,439,709,217         |
| 2036                  | 1,470,812,762         |
| 2037                  | 1,504,188,405         |
| 2038                  | 1,538,321,407         |
| 2039                  | 1,573,228,954         |
| 2040                  | 1,608,928,623         |
| <b>TOTAL</b>          | <b>30,504,632,189</b> |
| <b>Annual average</b> | <b>1,245,087,028</b>  |

## 2. Credit (Energy and CO<sub>2</sub> Emissions Avoided by L4)

### 2.1. PKM Split between Buses and Automobiles. VKM and Quantity of Fuel

72% of the users were from buses (fueled by diesel) and 28% from automobiles [2].

The automobile fleet of the city has [3] (approximate, rounded numbers):

41.44% fueled only by gasoline,

6.00% fueled only by hydrous ethanol,

21.41% fueled by compressed natural gas (CNG),

31.55% flex-fuel (fueled by gasoline and ethanol in any proportion).

According to Equation (11), the percent of ethanol used by flex-fuel cars is:

$$\% \text{ ethanol} = -3.6945 \times (\text{ethanol price} \div \text{gasoline price}) + 3.0219 \quad (\text{s1})$$

The relation of prices has remained around 70%–80%. In 2014 it was 78.33% [4].

$\% \text{ ethanol} = -3.6945 \times (78.33\%) + 3.0219 = 12.81\%$ .

In flex-fuel there is  $12.81\% \times 31.55 = 4.04\%$  ethanol use and  $(31.55 - 4.04) = 27.51\%$  gasoline use.

Gasoline is used by  $41.44 + 27.51 = 68.95\%$  of autos fleet,

Hydrous ethanol is used by  $6.00 + 4.04 = 9.64\%$  of autos fleet,

CNG is used by  $21.41\%$  of autos fleet.

PKM is split to VKM-autos and VKM-buses. For autos  $VKM = PKM/1.4$ , since the assumption is 1.4 passengers per auto. For buses the assumption is 80 passengers during peak hours and 40 passengers during off-peak hours.

Peak hours correspond to  $20.70\%$  (morning) +  $25.80\%$  (evening) =  $46.50\%$  of PKM [1].

Off-peak hours correspond to  $53.50\%$  of PKM.

Efficiency considered: autos gasoline– $10 \text{ km/L}$ ; autos ethanol– $8.65 \text{ km/L}$ ; autos CNG– $12 \text{ km/m}^3$  and diesel bus– $2.30 \text{ km/L}$ .

The blend fuel for gasoline cars is  $73\%$  gasoline and  $27\%$  anhydrous ethanol. The blend fuel for diesel buses is  $93\%$  diesel and  $7\%$  biodiesel.

The symbol used for liter is “L” to avoid confusion between the letter “l” and the number “1”.

### 2.1.1. Buses

Applying Equation (5):

$$VKM \text{ Bus} = ((72\% \times PKM \times 46.5\%)/80) + ((72\% \times PKM \times 53.5\%)/40) = ((72\% \times 30,504,632,189 \times 46.5\%)/80) + ((72\% \times 30,504,632,189 \times 53.5\%)/40) = 421,421,494$$

The fuel quantity  $Q_f$  for VKM bus is (Equation (6)):

**Diesel:**

$$Q_f = (VKM \text{ Bus}/2.3) \times 93\% = (421,421,494/2.3) \times 93\% = \mathbf{170,400,865 \text{ L}}$$

**Biodiesel:**

$$Q_f = (VKM \text{ Bus}/2.3) \times 7\% = (421,421,494/2.3) \times 7\% = \mathbf{12,825,872 \text{ L}}$$

### 2.1.2. Auto Gasoline

Applying Equation (5):

$$VKM \text{ Auto gasoline} = (28\% \times PKM \times 68.95\%)/1.4 = (28\% \times 30,504,632,189 \times 68.95\%)/1.4 = 4,206,588,779$$

The fuel quantity  $Q_f$  for VKM Auto gasoline is (Equation (6)):

**Gasoline:**

$$Q_f = (VKM \text{ Auto gasoline}/10) \times 73\% = (4,206,588,779/10) \times 73\% = \mathbf{307,080,981 \text{ L}}$$

**Anhydrous Ethanol:**

$$Q_f = (VKM \text{ Auto gasoline}/10) \times 27\% = (4,206,588,779/10) \times 27\% = \mathbf{113,577,897 \text{ L}}$$

### 2.1.3. Auto Ethanol

Applying Equation (5):

$$VKM \text{ Auto ethanol} = (28\% \times PKM \times 9.64\%)/1.4 = (28\% \times 30,504,632,189 \times 9.64\%)/1.4 = 588,129,309$$

The fuel quantity  $Q_f$  for VKM Auto ethanol is (Equation (6)):

**Hydrous Ethanol:**

$$Q_f = VKM \text{ Auto ethanol}/8.65 = 588,129,309/8.65 = \mathbf{67,991,828 \text{ L}}$$

### 2.1.4. Auto CNG

Applying Equation (5):

$$VKM \text{ Auto CNG} = (28\% \times PKM \times 21.41\%)/1.4 = (28\% \times 30,504,632,189 \times 21.41\%)/1.4 = 1,306,208,350$$

The fuel quantity  $Q_f$  for VKM Auto CNG is (Equation (6)):

**CNG:**

$$Q_f = VKM \text{ Auto CNG}/12 = 1,306,208,350/12 = \mathbf{108,850,696 \text{ m}^3}$$

## 2.2. Avoided Energy and CO<sub>2</sub> Emissions by L4

Energy density and CO<sub>2</sub> emissions factors used are presented in Table S11.

**Table S11.** Energy density and CO<sub>2</sub> emissions factors, including upstream energy and CO<sub>2</sub> emissions.

| Fuel              | Energy Density          | CO <sub>2</sub> Emission Factor        | Source                                             |
|-------------------|-------------------------|----------------------------------------|----------------------------------------------------|
| Gasoline          | 36.36 MJ/L              | 2.57 kgCO <sub>2</sub> /L              | Calculated from ANP [4], D'Agosto [5] and IPCC [6] |
| Diesel            | 40.82 MJ/L              | 2.95 kgCO <sub>2</sub> /L              | Calculated from ANP [4], D'Agosto [7] and IPCC [6] |
| CNG               | 39.82 MJ/m <sup>3</sup> | 2.16 kgCO <sub>2</sub> /m <sup>3</sup> | COPPETEC [8] and D'Agosto [5]                      |
| Biodiesel         | 43.07 MJ/L              | 0.40 kgCO <sub>2</sub> /L              | ANP [4] and D'Agosto [7]                           |
| Hydrous Ethanol   | 33.71 MJ/L              | 0.09 kgCO <sub>2</sub> /L              | ANP [4] and D'Agosto [5]                           |
| Anhydrous Ethanol | 24.60 MJ/L              | 0.02 kgCO <sub>2</sub> /L              | ANP [4] and D'Agosto [5]                           |

Note: WTW values for Gasoline, Diesel and CNG CO<sub>2</sub> emission factor and all energy density. WTT values for Biodiesel/Anhydrous Ethanol/Hydrous Ethanol CO<sub>2</sub> emission factor.

Calculation for Gasoline and Diesel (TTW):

According to ANP [4], Brazilian fuels have:

Net calorific value: diesel = 10,100 kcal/kg and gasoline = 10,400 kcal/kg.

Density: diesel = 0.84 kg/L and gasoline = 0.742 kg/L.

1 kcal = 0.004184 MJ.

For diesel: Energy density = 10,100 × 0.004184 × 0.84 = 35.50 MJ/L.

For gasoline: Energy density = 10,400 × 0.004184 × 0.742 = 32.29 MJ/L.

According to IPCC (50) CO<sub>2</sub> emissions, per natural unit, can be estimated by:

$$NCV \times EF \times F \times (44/12)$$

where: NCV = Net calorific value (in TJ/natural unit), EF = carbon emission factor (carbon content, in tC/TJ), EF for diesel = 20.20 tC/TJ; EF for gasoline = 18.9 tC/TJ, F = oxidation factor = 0.99, 44/12 = conversion factor from carbon to carbon dioxide (CO<sub>2</sub>).

CO<sub>2</sub> Emission factor for diesel = (35.50/1000000) TJ/L × 20.2 tC/TJ × 0.99 × (44/12) = 0.00260 tCO<sub>2</sub>/L = 2.60 kgCO<sub>2</sub>/L.

CO<sub>2</sub> Emission factor for gasoline = (32.29/1000000) TJ/L × 18.9 tC/TJ × 0.99 × (44/12) = 0.00222 tCO<sub>2</sub>/L = 2.22 kgCO<sub>2</sub>/L.

Adding the upstream energy and emissions (WTW):

Energy density for diesel = 40.82 MJ/L

Energy density for gasoline = 36.36 MJ/L

CO<sub>2</sub> Emission factor for diesel = 2.95 kgCO<sub>2</sub>/L.

CO<sub>2</sub> Emission factor for gasoline = 2.57 kgCO<sub>2</sub>/L.

### 2.2.1. Avoided Energy

Energy, calculated by Equation (7), is:

$$E_n = Q_f \times E_d$$

**Gasoline:**  $E_n = 307,080,981 \times 36.36 = 11,165,464,464 \text{ MJ} = \mathbf{11,165 \text{ TJ}}$

**CNG:**  $E_n = 108,850,696 \times 39.82 = 4,334,434,709 \text{ MJ} = \mathbf{4334 \text{ TJ}}$

**Diesel:**  $E_n = 170,400,865 \times 40.82 = 6,955,763,303 \text{ MJ} = \mathbf{6956 \text{ TJ}}$

**Anhydrous Ethanol:**  $E_n = 113,577,897 \times 24.60 = 2,794,016,267 \text{ MJ} = \mathbf{2794 \text{ TJ}}$

**Hydrous Ethanol:**  $E_n = 67,991,828 \times 33.71 = 2,292,004,508 \text{ MJ} = \mathbf{2292 \text{ TJ}}$

**Biodiesel:**  $E_n = 12,825,872 \times 43.07 = 552,410,288 \text{ MJ} = \mathbf{552 \text{ TJ}}$

**Total Non-Renewable Energy** = 11,165,464,464 + 4,334,434,709 + 6,955,763,303 = 22,455,662,476 MJ = **22,456 TJ**

**Total Renewable Energy** = 2,794,016,267 + 2,292,004,508 + 552,410,288 = 5,638,431,062 MJ = **5638 TJ**

**Total Energy** = 22,455,662,476 + 5,638,431,062 = 28,094,093,538 MJ = **28,094 TJ**

### 2.2.2. Avoided CO<sub>2</sub> Emissions

CO<sub>2</sub> emissions, calculated by Equation (8), have values:

$$E_m = Q_f \times E_f$$

**Gasoline:**  $E_m = 307,080,981 \times 2.57/1000 = 789,198 \text{ t CO}_2$

**CNG:**  $E_m = 108,850,696 \times 2.16/1000 = 235,118 \text{ t CO}_2$

**Diesel:**  $E_m = 170,400,865 \times 2.95/1000 = 502,863 \text{ t CO}_2$

**Anhydrous Ethanol:**  $E_m = 113,577,897 \times 0.02/1000 = 2272 \text{ t CO}_2$

**Hydrous Ethanol:**  $E_m = 67,991,828 \times 0.09/1000 = 6119 \text{ t CO}_2$

**Biodiesel:**  $E_m = 12,825,872 \times 0.40/1000 = 5130 \text{ t CO}_2$

**Total CO<sub>2</sub> emissions** =  $789,198 + 235,118 + 502,863 + 2272 + 6119 + 5130 = 1,540,519 \text{ t CO}_2$

### 3. Debit (Energy Consumed and CO<sub>2</sub> Emissions Produced by L4)

*Energy Consumed and CO<sub>2</sub> Emissions Produced by L4*

There are 149,220 train departures for a distance of 12.339 km and 97,812 train departures for a distance of 5.215 km.

The train has six cars. Reference load = 1820 passengers per train (or 1820/6 passengers per car).

Energy Consumed by L4

Total car-km per year is given by Equation (2):

$$c = d \times l \times n = (149,220 \times 12.339 + 97,812 \times 5.215) \times 6 = 14,107,891 \text{ [1]}.$$

Total PKM = 30,504,632,189. Total PKM per year =  $30,504,632,189/24.5 = 1,245,087,028$ .

PKM per year for the Reference Load =  $14,107,891 \times (1820/6) = 4,279,393,603$ .

Load =  $1,245,087,028/4,279,393,603 = 29.09\%$ .

Energy consumed per car-km for this load (Equation (9)):

$$c = 2.97 + (1.83 \times 29.09\%)/118\% = 3.42 \text{ kWh/car-km [1]}.$$

According to Equation (2) and considering T&D losses = 12% [9,10]): Total energy consumed by year =  $(14,107,891 \times 3.42)/0.88 = 54,828,394 \text{ kWh}$ .

**Total energy** in the period: second half of 2016–2040 =  $24.5 \times 54,828,394 = 1,343,295,663 \text{ kWh} = 3.6 \times 1,343,295,663 = 4,835,864,387 \text{ MJ} = 4836 \text{ TJ}$

Brazilian electric matrix: 74.60% Renewable and 25.40% Non-Renewable [11].

**Renewable** =  $74.60\% \times 4,835,864,387 = 3,607,554,833 \text{ MJ} = 3608 \text{ TJ}$

**Non-Renewable** =  $25.40\% \times 4,835,864,387 = 1,228,309,554 \text{ MJ} = 1228 \text{ TJ}$

CO<sub>2</sub> Emissions Produced by L4

Applying Equation (4) of the article:

**Emissions produced** in the period: second half of 2016–2040 =  $1,343,295,663 \text{ kWh} \times 0.1355 \text{ kgCO}_2/\text{kWh} = 182,017 \text{ t CO}_2$

### 4. Net Avoided Energy and CO<sub>2</sub> Emissions (Credit—Debit)

**Net Avoided Non-Renewable Energy** =  $22,455,662,476 - 1,228,309,554 = 21,227,352,922 \text{ MJ} = 21,227 \text{ TJ}$

**Net Avoided Renewable Energy** =  $5,638,431,062 - 3,607,554,833 = 2,030,876,229 \text{ MJ} = 2031 \text{ TJ}$

**Net Avoided Energy** =  $28,094,093,538 - 4,835,864,387 = 23,258,229,151 \text{ MJ} = 23,258 \text{ TJ}$

Net Avoided Emissions =  $1,540,519 - 182,017 = 1,358,503 \text{ t CO}_2$

Net Avoided Non-Renewable Energy per year =  $21,227,352,922/24.5 = 866,422,568 \text{ MJ} = 866 \text{ TJ}$

**Net Avoided Renewable Energy per year** =  $2,030,876,229/24.5 = 82,892,907 \text{ MJ} = 83 \text{ TJ}$

**Net Avoided Energy per year** =  $23,258,229,151/24.5 = 949,315,476 \text{ MJ} = 949 \text{ TJ}$

Net Avoided Emissions per year =  $1,358,503/24.5 = 55,449 \text{ t CO}_2$

Net Avoided Non-Renewable Energy per PKM =  $21,227,352,922/30,504,632,189 = 0.70 \text{ MJ}$

Net Avoided Renewable Energy per PKM =  $2,030,876,229/30,504,632,189 = 0.07 \text{ MJ}$



**Net Avoided Energy per PKM** = 23,258,229,151/30,504,632,189 = **0.76 MJ**

**Net Avoided Emissions per PKM** = (1,358,888/30,504,632,189) × 1,000,000 = **44.53 g CO<sub>2</sub>**

## 5. Scenarios

Scenario A: the PKM value will increase, making passenger load equal to 50%. In this case, “debit” and “credit” will be affected.

### Debit:

The energy consumption per car-km for load = 50% can be determined by applying Equation (10):

$$c = 2.97 + (1.83 \times l)/118\% = 2.97 + (1.83 \times 50\%)/118\% = 3.75 \text{ kWh/car-km}$$

$$\text{Energy} = (14,107,891 \times 24.5 \times 3.75)/0.88 \text{ kWh} = 1,471,114,464 \text{ kWh} = 1,472,911,915 \times 3.6 = 5,296,012,069 \text{ MJ}$$

$$\text{Renewable Energy} = 74.60\% \times 5,296,012,069 = 3,950,825,004 \text{ MJ}$$

$$\text{Non-Renewable Energy} = 5,296,012,069 - 3,950,825,004 = 1,345,187,066 \text{ MJ}$$

$$\text{CO}_2 \text{ emissions} = (1,471,114,464 \times 0.1355)/1000 = 199,336 \text{ t CO}_2$$

### Credit:

PKM is proportional to passenger load. PKM for load = 50% is:

$$\text{PKM}_{L=50\%} = \text{PKM}_{L=29.09\%} \times (0.5/0.2909) = 30,504,632,189 \times (0.5/0.2909) = 52,422,571,492$$

Applying Equation (5):

$$\text{VKM Bus} = ((72\% \times \text{PKM} \times 46.5\%)/80) + ((72\% \times \text{PKM} \times 53.5\%)/40) = ((72\% \times 52,431,475,059 \times 46.5\%)/80) + ((72\% \times 52,431,475,059 \times 53.5\%)/40) = 724,217,825$$

The fuel quantity  $Q_f$  for VKM bus is (Equation (6)):

$$\text{Diesel: } Q_f = (\text{VKM Bus}/2.3) \times 93\% = (724,217,825/2.3) \times 93\% = 292,835,903 \text{ L}$$

$$\text{Biodiesel: } Q_f = (\text{VKM Bus}/2.3) \times 7\% = (724,217,825/2.3) \times 7\% = 22,041,412 \text{ L}$$

Applying Equation (5):

$$\text{VKM Auto gasoline} = (28\% \times \text{PKM} \times 68.95\%)/1.4 = 7,229,437,709$$

The fuel quantity  $Q_f$  for VKM Auto gasoline is (Equation (6)):

$$\text{Gasoline: } Q_f = (\text{VKM Auto gasoline}/10) \times 73\% = 527,722,300 \text{ L}$$

$$\text{Anhydrous Ethanol: } Q_f = (\text{VKM Auto gasoline}/10) \times 27\% = 195,184,960 \text{ L}$$

Applying Equation (5):

$$\text{VKM Auto ethanol} = (28\% \times \text{PKM} \times 9.64\%)/1.4 = 1,010,257,572$$

The fuel quantity  $Q_f$  for VKM Auto ethanol is (Equation (6)):

$$\text{Ethanol: } Q_f = \text{VKM Auto Ethanol}/8.65 = 116,844,761 \text{ L}$$

Applying Equation (5):

$$\text{VKM Auto CNG} = (28\% \times \text{PKM} \times 9.64\%)/1.4 = 2,244,819,018$$

The fuel quantity  $Q_f$  for VKM Auto CNG is (Equation (6)):

$$\text{CNG: } Q_f = \text{VKM Auto CNG}/12 = 187,061,209 \text{ m}^3$$

Energy, calculated by Equation (7), is:

$$E_n = Q_f \times E_d$$

$$\text{Gasoline: } E_n = 527,722,300 \times 36.36 = 19,187,982,844 \text{ MJ}$$

$$\text{CNG: } E_n = 187,061,209 \times 39.82 = 7,448,777,353 \text{ MJ}$$

$$\text{Diesel: } E_n = 292,835,903 \times 40.82 = 11,953,561,569 \text{ MJ}$$

$$\text{Anhydrous Ethanol: } E_n = 195,184,960 \times 24.60 = 4,801,550,027 \text{ MJ}$$

$$\text{Hydrous Ethanol: } E_n = 116,844,761 \times 33.71 = 3,938,836,877 \text{ MJ}$$

$$\text{Biodiesel: } E_n = 22,041,412 \times 43.07 = 949,323,618 \text{ MJ}$$

$$\text{Total Non-Renewable Energy} = 19,187,982,844 + 7,448,777,353 + 11,953,561,569 = 38,590,321,767 \text{ MJ}$$

$$\text{Total Renewable Energy} = 4,801,550,027 + 3,938,836,877 + 949,323,618 = 9,689,710,521 \text{ MJ}$$

$$\text{Total Energy} = 38,590,321,767 + 9,689,710,521 = 48,280,032,288 \text{ MJ}$$

CO<sub>2</sub> emissions, calculated by Equation (8), is:

$$E_m = Q_f \times E_f$$

$$\text{Gasoline: } E_m = 527,722,300 \times 2.57/1,000 = 1,356,246 \text{ t CO}_2$$

$$\text{CNG: } E_m = 187,061,209 \times 2.16/1,000 = 404,052 \text{ t CO}_2$$

$$\text{Diesel: } E_m = 292,835,903 \times 2.95/1,000 = 863,866 \text{ t CO}_2$$

$$\text{Anhydrous Ethanol: } E_m = 195,184,960 \times 0.02/1,000 = 3904 \text{ t CO}_2$$

$$\text{Hydrous Ethanol: } E_m = 116,844,761 \times 0.09/1,000 = 10,516 \text{ t CO}_2$$

$$\text{Biodiesel: } E_m = 22,041,412 \times 0.40/1,000 = 8817 \text{ t CO}_2$$

$$\text{Total CO}_2 \text{ emissions} = 1,356,246 + 404,052 + 863,866 + 3,904 + 10,516 + 8817 = 2,647,401 \text{ t CO}_2$$

**Net avoided Energy and CO<sub>2</sub> Emissions (Credit – Debit):**

$$\text{Net Avoided Non-Renewable Energy} = 38,590,321,767 - 1,345,187,066 = 37,245,134,701 \text{ MJ}$$

$$\text{Net Avoided Renewable Energy} = 9,689,710,521 - 3,950,825,004 = 5,738,885,518 \text{ MJ}$$

$$\text{Net Avoided Energy} = 48,280,032,288 - 5,296,012,069 = 42,984,020,219 \text{ MJ}$$

$$\text{Net Avoided Emissions} = 2,647,401 - 199,336 = 2,448,065 \text{ t CO}_2$$

$$\text{Net Avoided Non-Renewable Energy per year} = 37,245,134,701/24.5 = 1,520,209,580 \text{ MJ} = \mathbf{1520 \text{ TJ}}$$

$$\text{Net Avoided Renewable Energy per year} = 5,738,885,518/24.5 = 234,240,225 \text{ MJ} = \mathbf{234 \text{ TJ}}$$

$$\text{Net Avoided Energy per year} = 42,984,020,219/24.5 = 1,754,449,805 \text{ MJ} = \mathbf{1754 \text{ TJ}}$$

$$\text{Net Avoided Emissions per year} = 2,448,065/24.5 = 99,921 \text{ t CO}_2$$

**Sensitivity analysis:**

Figure S1 and Table S12 shows the results for avoided and produced emissions, for different loads.

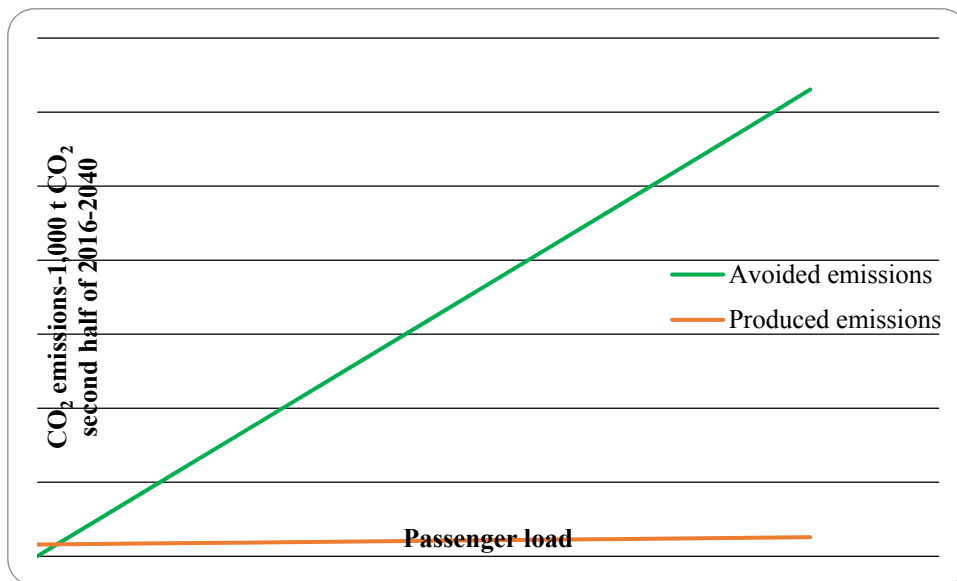

Figure S1. Sensitivity analysis of L4 transport performance.

**Table S12.** Avoided and produced emissions

| <b>Load</b> | <b>Avoided Emissions (1000 t CO<sub>2</sub>)</b> | <b>Produced Emissions (1000 t CO<sub>2</sub>)</b> |
|-------------|--------------------------------------------------|---------------------------------------------------|
| 0           | 0                                                | 158                                               |
| 10%         | 525                                              | 166                                               |
| 20%         | 1050                                             | 175                                               |
| 30%         | 1574                                             | 183                                               |
| 40%         | 2099                                             | 191                                               |
| 50%         | 2624                                             | 199                                               |
| 60%         | 3149                                             | 208                                               |
| 70%         | 3674                                             | 216                                               |
| 80%         | 4199                                             | 224                                               |
| 90%         | 4723                                             | 232                                               |
| 100%        | 5248                                             | 241                                               |
| 110%        | 5773                                             | 249                                               |
| 120%        | 6305                                             | 257                                               |

**Scenario B:** train departures decreases 30%, increasing passenger load. PKM does not change, so “Credit” will not be affected.

**Debit:**

Car-km also decreases 30%: car-km =  $0.7 \times 14,107,891 = 9,875,524$  per year.

PKM remains the same: PKM = 1,245,087,028

PKM for the reference load is:  $PKM_{RL} = 9,875,524 \times (1820/6) = 2,995,575,522$

Load:  $1,245,087,028/2,995,575,522 = 41.56\%$

Energy consumed per car-km for this load (Equation (10)):

$c = 2.97 + (1.83 \times 41.56\%)/118\% = 3.61$  kWh/car-km [1].

Energy consumed:  $9,875,524 \times 3.61 \times 24.5 = 992,546,243$  kWh =  $3.6 \times 992,546,243 = 3,573,166,474$  MJ

Energy Renewable:  $74.60\% \times 3,573,166,474 = 2,665,582,190$  MJ

Energy Non-Renewable:  $25.40\% \times 3,573,166,474 = 907,584,284$  MJ

CO<sub>2</sub> Emissions:  $0.1355 \times 992,546,243/1000 = 134,490$  t CO<sub>2</sub>

**Credit:**

As “Credit” is not affected is the same of the study:

Total Non-Renewable Energy = 22,455,662,476 MJ

Total Renewable Energy = 5,638,431,062 MJ

Total Energy = 28,094,093,538 MJ

Total CO<sub>2</sub> emissions = 1,540,519 t CO<sub>2</sub>

**Net Avoided per year:**

**Total Non-Renewable Energy** =  $(22,455,662,476 - 907,584,284)/24.5 = 879,513,396$  MJ = **880 TJ**

**Total Renewable Energy** =  $(5,638,431,062 - 2,665,582,190)/24.5 = 121,340,770$  MJ = **121 TJ**

**Total Energy** =  $(28,094,093,538 - 3,573,166,474)/24.5 = 1,000,854,166$  MJ = **1001 TJ**

**Total CO<sub>2</sub> emissions** =  $(1,540,519 - 134,490)/24.5 = 57,389$  t CO<sub>2</sub>

**Scenario C:** the electricity mix has higher carbon intensity. The average European emission factor of 2015 (0.35047 kgCO<sub>2</sub>/kWh) was used [5].

The only change will be in CO<sub>2</sub> emissions (debit).

**Debit:**

$1,343,295,663$  kWh  $\times$   $0,35047$  kgCO<sub>2</sub>/kWh =  $470,785$  t CO<sub>2</sub>

**Credit:**

As "Credit" is not affected, is the same of the study:

Total Non-Renewable Energy = 22,455,662,476 MJ

Total Renewable Energy = 5,638,431,062 MJ

Total Energy = 28,094,093,538 MJ

Total CO<sub>2</sub> emissions = 1,540,519 t CO<sub>2</sub>

**Net Avoided per year:**

**Total Non-Renewable Energy** =  $(22,455,662,476 - 3,177,015,864)/24.5 = 786,883,535 \text{ MJ} = 787 \text{ TJ}$

**Total Renewable Energy** =  $(5,638,431,062 - 1,658,848,524)/24.5 = 162,431,940 \text{ MJ} = 162 \text{ TJ}$

**Total Energy** =  $(28,094,093,538 - 4,835,864,387)/24.5 = 949,315,476 \text{ MJ} = 949 \text{ TJ}$

**Total CO<sub>2</sub> emissions** =  $(1,540,519 - 470,785)/24.5 = 43,663 \text{ t CO}_2$

**Scenario D:** there is no consumption of alternative fuels. All cars use gasoline and all buses use diesel.

**Debit:**

Debit does not change, is the same of the study:

Energy consumed = 4,835,864,387 MJ.

Renewable = 3,607,554,833 MJ.

Non-Renewable = 1,228,309,554 MJ.

CO<sub>2</sub> Emissions = 182,017 t CO<sub>2</sub>.

**Credit:**

Applying Equation (5):

VKM Bus =  $((72\% \times \text{PKM} \times 46.5\%)/80) + ((72\% \times \text{PKM} \times 53.5\%)/40) = ((72\% \times 30,504,632,189) \times 46.5\%)/80 + ((72\% \times 30,504,632,189) \times 53.5\%)/40 = 421,421,494$

The fuel quantity  $Q_f$  for VKM bus is (Equation (6)):

Diesel:  $Q_f = (\text{VKM Bus}/2.3) = 421,421,494/2.3 = 183,226,736 \text{ L}$

Applying Equation (5):

VKM Auto gasoline =  $(28\% \times \text{PKM})/1.4 = (28\% \times 30,504,632,189)/1.4 = 6,100,926,438$

The fuel quantity  $Q_f$  for VKM Auto gasoline is (Equation (6)):

Gasoline:  $Q_f = (\text{VKM Auto gasoline}/10) = 6,100,926,438/10 = 610,092,644 \text{ L}$

Energy, calculated by Equation (7), is:

$E_n = Q_f \times E_d$

Gasoline:  $E_n = 610,092,644 \times 36.36 = 22,182,968,528 \text{ MJ}$

Diesel:  $E_m = 183,226,736 \times 40.82 = 7,479,315,379 \text{ MJ}$

Total Non-Renewable Energy =  $22,182,968,528 + 7,479,315,379 = 29,662,283,907 \text{ MJ}$

Total Renewable Energy = 0 MJ

Total Energy =  $29,662,283,907 + 0 = 29,662,283,907 \text{ MJ}$

CO<sub>2</sub> emissions, calculated by Equation (8), is:

$E_m = Q_f \times E_f$

Gasoline:  $E_m = 610,092,644 \times 2.57/1,000 = 1,567,938 \text{ t CO}_2$

Diesel:  $E_m = 183,226,736 \times 2.95/1,000 = 540,519 \text{ t CO}_2$

Total CO<sub>2</sub> emissions =  $1,567,938 + 540,519 = 2,108,457 \text{ t CO}_2$

**Net Avoided per year:**

**Total Non-Renewable Energy** =  $(29,662,283,907 - 1,228,309,554)/24.5 = 1,160,570,382 \text{ MJ} = 1161 \text{ TJ}$

**Total Renewable Energy** =  $(0 - 3,607,554,833)/24.5 = -147,247,136 \text{ MJ} = -147 \text{ TJ}$

**Total Energy** =  $(29,662,283,907 - 4,835,864,387)/24.5 = 1,013,323,246 \text{ MJ} = 1013 \text{ TJ}$

**Total CO<sub>2</sub> emissions** =  $(2,108,457 - 182,017)/24.5 = 78,630 \text{ t CO}_2$

**Scenario E:** the passenger load of cars increases to three passengers.

**Debit:**

Debit is not affected:

Energy consumed = 4,835,864,387 MJ

Renewable = 3,607,554,833 MJ

Non-Renewable = 1,228,309,554 MJ

CO<sub>2</sub> Emissions = 182,017 t CO<sub>2</sub>

**Credit:**

Applying Equation (5):

$$\text{VKM Bus} = ((72\% \times \text{PKM} \times 46.5\%)/80) + ((72\% \times \text{PKM} \times 53.5\%)/40) = ((72\% \times 30,504,632,189) \times 46.5\%)/80 + ((72\% \times 30,504,632,189) \times 53.5\%)/40 = 421,421,494$$

The fuel quantity  $Q_f$  for VKM bus is (Equation (6)):

Diesel:  $Q_f = (\text{VKM Bus}/2.3) \times 93\% = (421,421,494/2.3) \times 93\% = 170,400,865 \text{ L}$

Biodiesel:  $Q_f = (\text{VKM Bus}/2.3) \times 7\% = (421,421,494/2.3) \times 7\% = 12,825,872 \text{ L}$

Applying Equation (5):

$$\text{VKM Auto gasoline} = (28\% \times \text{PKM} \times 68.95\%)/3 = (28\% \times 30,504,632,189 \times 68.95\%)/3 = 1,963,074,763$$

The fuel quantity  $Q_f$  for VKM Auto gasoline is (Equation (6)):

Gasoline:

$$Q_f = (\text{VKM Auto gasoline}/10) \times 73\% = 1,963,074,763/10 \times 73\% = 143,304,458 \text{ L}$$

Anhydrous Ethanol:

$$Q_f = (\text{VKM Auto gasoline}/10) \times 27\% = 1,963,074,763/10 \times 27\% = 53,003,019 \text{ L}$$

Applying Equation (5):

$$\text{VKM Auto ethanol} = (28\% \times \text{PKM} \times 9.64\%)/3 = (28\% \times 30,504,632,189 \times 9.64\%)/3 = 274,460,344$$

The fuel quantity  $Q_f$  for VKM Auto ethanol is (Equation (6)):

Hydrous Ethanol:

$$Q_f = \text{VKM Auto ethanol}/8.65 = 31,729,520 \text{ L}$$

Applying Equation (5):

$$\text{VKM Auto CNG} = (28\% \times \text{PKM} \times 21.41\%)/3 = (28\% \times 30,504,632,189 \times 21.41\%)/3 = 609,563,897$$

The fuel quantity  $Q_f$  for VKM Auto CNG is (Equation (6)):

CNG:

$$Q_f = \text{VKM Auto CNG}/12 = 609,563,897/12 = 50,796,991 \text{ m}^3$$

Energy, calculated by Equation (7), is:

$$E_n = Q_f \times E_d$$

$$\text{Gasoline} \text{ ----- } E_n = 143,304,458 \times 36.36 = 5,210,550,083 \text{ MJ}$$

$$\text{CNG} \text{ ----- } E_m = 50,796,991 \times 39.82 = 2,022,736,198 \text{ MJ}$$

$$\text{Diesel} \text{ ----- } E_m = 170,400,865 \times 40.82 = 6,955,763,303 \text{ MJ}$$

$$\text{Anhydrous Ethanol} \text{ ----- } E_n = 53,003,019 \times 24.60 = 1,303,874,258 \text{ MJ}$$

$$\text{Hydrous Ethanol} \text{ ----- } E_n = 31,729,520 \times 33.71 = 1,069,602,104 \text{ MJ}$$

$$\text{Biodiesel} \text{ ----- } E_n = 12,825,872 \times 43.07 = 552,410,288 \text{ MJ}$$

$$\text{Total Non-Renewable Energy} = 5,210,550,083 + 2,022,736,198 + 6,955,763,303 = 14,189,049,584 \text{ MJ}$$

$$\text{Total Renewable Energy} = 1,303,874,258 + 1,069,602,104 + 552,410,288 = 2,925,886,649 \text{ MJ}$$

$$\text{Total Energy} = 14,189,049,584 + 2,925,886,649 = 17,114,936,233 \text{ MJ}$$

CO<sub>2</sub> emissions, calculated by Equation (8), is:

$$E_m = Q_f \times E_f$$

$$\text{Gasoline} \text{ ----- } E_m = 143,304,458 \times 2.57/1000 = 368,292 \text{ t CO}_2$$

$$\text{CNG} \text{ ----- } E_m = 50,796,991 \times 2.16/1000 = 109,722 \text{ t CO}_2$$

$$\text{Diesel} \text{ ----- } E_m = 170,400,865 \times 2.95/1000 = 502,683 \text{ t CO}_2$$

$$\text{Anhydrous Ethanol: } E_m = 53,003,019 \times 0.02/1000 = 1060 \text{ t CO}_2$$

$$\text{Hydrous Ethanol: } E_m = 31,729,520 \times 0.09/1000 = 2856 \text{ t CO}_2$$

Biodiesel:  $E_m = 12,825,872 \times 0.40/1,000 = 5130 \text{ t CO}_2$

Total CO<sub>2</sub> emissions =  $368,292 + 109,722 + 502,683 + 1060 + 2856 + 5130 = 989,743 \text{ t CO}_2$

**Net Avoided per year:**

**Total Non-Renewable Energy** =  $(14,189,049,584 - 1,228,309,554)/24.5 = 529,009,797 \text{ MJ} = 529 \text{ TJ}$

**Total Renewable Energy** =  $(2,925,886,649 - 3,607,554,833)/24.5 = -27,823,191 \text{ MJ} = -28 \text{ TJ}$

**Total Energy** =  $(17,114,936,233 - 4,835,864,387)/24.5 = 501,186,606 \text{ MJ} = 501 \text{ TJ}$

**Total CO<sub>2</sub> emissions** =  $(989,743 - 182,017)/24.5 = 32,968 \text{ t CO}_2$

**Scenario F:** the proportion of cars and buses changes from 28% to 42% for cars (growth of 50%) and from 72% to 58% for buses.

**Debit:**

Debit is not affected:

Energy consumed =  $4,835,864,387 \text{ MJ}$

Renewable =  $3,607,554,833 \text{ MJ}$

Non-Renewable =  $1,228,309,554 \text{ MJ}$

CO<sub>2</sub> Emissions =  $182,017 \text{ t CO}_2$

**Credit:**

Applying Equation (5):

VKM Bus =  $((58\% \times \text{PKM} \times 46.5\%)/80) + ((58\% \times \text{PKM} \times 53.5\%)/40) = ((58\% \times 30,504,632,189) \times 46.5\%/80) + ((58\% \times 30,504,632,189) \times 53.5\%/40) = 339,478,425$

The fuel quantity  $Q_f$  for VKM bus is (Equation (6)):

Diesel:  $Q_f = (\text{VKM Bus}/2.3) \times 93\% = (339,478,425/2.3) \times 93\% = 137,267,363 \text{ L}$

Biodiesel:  $Q_f = (\text{VKM Bus}/2.3) \times 7\% = (339,478,425/2.3) \times 7\% = 10,331,952 \text{ L}$

Applying Equation (5):

VKM Auto gasoline =  $(42\% \times \text{PKM} \times 68.95\%)/1.4 = (42\% \times 30,504,632,189 \times 68.95\%)/1.4 = 6,309,883,168$

The fuel quantity  $Q_f$  for VKM Auto gasoline is (Equation (6)):

Gasoline:  $Q_f = (\text{VKM Auto gasoline}/10) \times 73\% = (6,309,883,168/10) \times 73\% = 460,621,471 \text{ L}$

Anhydrous Ethanol:  $Q_f = (\text{VKM Auto gasoline}/10) \times 27\% = (6,309,883,168/10) \times 27\% = 170,366,846 \text{ L}$

Applying Equation (5):

VKM Auto ethanol =  $(42\% \times \text{PKM} \times 9.64\%)/1.4 = (42\% \times 30,504,632,189 \times 9.64\%)/1.4 = 882,193,963$

The fuel quantity  $Q_f$  for VKM Auto ethanol is (Equation (6)):

Ethanol:  $Q_f = \text{VKM Auto ethanol}/8.65 = 882,193,963/8.65 = 101,987,741 \text{ L}$

Applying Equation (5):

VKM Auto CNG =  $(42\% \times \text{PKM} \times 9.64\%)/1.4 = (42\% \times 30,504,632,189 \times 9.64\%)/1.4 = 1,959,312,526$

The fuel quantity  $Q_f$  for VKM Auto CNG is (Equation (6)):

CNG:  $Q_f = \text{VKM Auto CNG}/12 = 1,959,312,526/12 = 163,276,044 \text{ m}^3$

Energy, calculated by Equation (7), is:

$E_n = Q_f \times E_d$

Gasoline:  $E_n = 460,621,471 \times 36.36 = 16,748,196,696 \text{ MJ}$

CNG:  $E_n = 163,276,044 \times 39.82 = 6,501,652,064 \text{ MJ}$

Diesel:  $E_n = 137,267,363 \times 40.82 = 5,603,253,772 \text{ MJ}$

Anhydrous Ethanol:  $E_n = 170,366,846 \times 24.60 = 4,191,024,400 \text{ MJ}$

Hydrous Ethanol:  $E_n = 101,987,741 \times 33.71 = 3,438,006,762 \text{ MJ}$

Biodiesel:  $E_n = 10,331,952 \times 43.07 = 444,997,176 \text{ MJ}$

Total Non-Renewable Energy =  $16,748,196,696 + 6,501,652,064 + 5,603,253,772 = 28,853,102,532 \text{ MJ}$

Total Renewable Energy =  $4,191,024,400 + 3,438,006,762 + 444,997,176 = 8,074,028,338 \text{ MJ}$

Total Energy =  $28,853,102,532 + 8,074,028,338 = 36,927,130,870 \text{ MJ}$

CO<sub>2</sub> emissions, calculated by Equation (8), is:

$$E_m = Q_f \times E_f$$

$$\text{Gasoline: } E_m = 460,621,471 \times 2.57/1000 = 1,183,797 \text{ t CO}_2$$

$$\text{CNG: } E_m = 163,276,044 \times 2.16/1000 = 352,676 \text{ t CO}_2$$

$$\text{Diesel: } E_m = 137,267,363 \times 2.95/1000 = 404,939 \text{ t CO}_2$$

$$\text{Anhydrous Ethanol: } E_m = 170,366,846 \times 0.02/1000 = 3407 \text{ t CO}_2$$

$$\text{Hydrous Ethanol: } E_m = 101,987,741 \times 0.09 = 9179 \text{ t CO}_2$$

$$\text{Biodiesel: } E_m = 10,331,952 \times 0.40 = 4133 \text{ t CO}_2$$

$$\text{Total CO}_2 \text{ emissions} = 1,183,797 + 352,676 + 404,939 + 3407 + 9179 + 4133 = 1,958,131 \text{ t CO}_2$$

**Net Avoided per year:**

$$\text{Total Non-Renewable Energy} = (28,853,102,532 - 1,228,309,554)/24.5 = 1,127,542,570 = \mathbf{1128 \text{ TJ}}$$

$$\text{Total Renewable Energy} = (8,074,028,338 - 3,607,554,833)/24.5 = 182,305,041 = \mathbf{182 \text{ TJ}}$$

$$\text{Total Energy} = (36,927,130,870 - 4,835,864,387)/24.5 = 1,309,847,612 = \mathbf{1310 \text{ TJ}}$$

$$\text{Total CO}_2 \text{ emissions} = (1,958,131 - 182,017)/24.5 = \mathbf{72,494 \text{ t CO}_2}$$

## References

1. Flores, J.F. Rio de Janeiro Metro-Engineering Director. Available online: <http://www.railwaypeople.com/rail-job-vacancies/engineering-manager-rio-de-janeiro-142268.html> (accessed on 17 November 2015).
2. FGV. Previsão de Demanda Linha 4 (Line 4 Demand Forecast). Available online: <http://www.metrolinha4.com.br/wp-content/uploads/2012/03/Relat%C3%B3rio-Final.pdf> (accessed on 17 November 2015). (In Portuguese)
3. DETRAN-RJ. Dados Sobre Veículos Cadastrados No Rio de Janeiro (Data on Registered Vehicles in Rio de Janeiro). Available online: [http://www.detran.rj.gov.br/\\_estatisticas.veiculos/07.asp](http://www.detran.rj.gov.br/_estatisticas.veiculos/07.asp) (accessed on 17 November 2015). (In Portuguese)
4. ANP. Anuário Estatístico de 2014. Agência Nacional do Petróleo (National Agency of Petroleum, Natural Gas and Biofuels). Available online: <http://www.anp.gov.br/?pg=71976> (accessed on 17 November 2015). (In Portuguese)
5. D'Agosto, M.A.; Ribeiro, S.K. Assessing total and renewable energy in Brazilian automotive fuels. A life cycle inventory (LCI) approach. *Renew. Sustain. Energy Rev.* **2009**, *13*, 1326–1337.
6. IPCC. 2006 IPCC Guidelines for National Greenhouse Gas Inventories. Intergovernmental Panel on Climate Change. Available online: <http://www.ipcc-nggip.iges.or.jp/public/2006gl/vol2.html> (accessed on 17 November 2015).
7. D'Agosto, M.A.; Oliveira, C.M.; Assumpção, F.C.; Deveza, A.C.P. Assessing Cleaner Energy Alternatives for Bus Transit in Rio de Janeiro: A Life Cycle Inventory Analysis. *J. Environ. Prot.* **2015**, *6*, 1197–1218.
8. COPPETEC. Inventário de Emissões Atmosféricas por Veículos Automotores do Estado do Rio de Janeiro. Fundação Coordenação de Projetos, Pesquisas e Estudos Tecnológicos. Available online: [http://download.rj.gov.br/documentos/10112/975111/DLFE-51272.pdf/Inventario\\_2011.pdf](http://download.rj.gov.br/documentos/10112/975111/DLFE-51272.pdf/Inventario_2011.pdf) (accessed on 17 November 2015). (In Portuguese)
9. ANEEL. Perdas de Energia. Agência Nacional de Energia Elétrica. Available online: <http://www.aneel.gov.br/area.cfm?idArea=801> (accessed on 10 August 2015). (In Portuguese)
10. LIGHT. Relatório de Sustentabilidade 2014. Available online: [http://www.light.com.br/Repositorio/Sustentabilidade/relatorio\\_sustentabilidade\\_2014.pdf](http://www.light.com.br/Repositorio/Sustentabilidade/relatorio_sustentabilidade_2014.pdf) (accessed on 17 November 2015). (In Portuguese)
11. EPE. Balanço Energético Nacional de 2014 (National Energy Balance 2014). Available online: [https://ben.epe.gov.br/downloads/S%C3%ADntese%20do%20Relat%C3%B3rio%20Final\\_2015\\_Web.pdf](https://ben.epe.gov.br/downloads/S%C3%ADntese%20do%20Relat%C3%B3rio%20Final_2015_Web.pdf) (accessed on 17 November 2015). (In Portuguese)
